# Supplementary material for: WNT-pathway components as predictive markers useful for diagnosis, prevention and therapy in inflammatory bowel disease and sporadic colorectal cancer
Source: PubMed Central journal article supplement (PMC4011599; doi:10.18632/oncotarget.1571), 2014-01-11
Supplement: oncotarget-05-978-s002.pdf [file oncotarget-05-978-s002.pdf]

WNT-pathway components as predictive markers useful for diagnosis, prevention and therapy in Inflammatory Bowel Disease and sporadic colorectal cancer. Serafino *et al.*

SUPPLEMENTARY Table S1

Supplementary Table S1. List of antibodies used for immunohistochemical analysis

| Antigen          | Host                | Cat. #            | Working dilution | Supplier                                   |
|------------------|---------------------|-------------------|------------------|--------------------------------------------|
| $\beta$ -catenin | Mouse (monoclonal)  | 610154 (Clone 14) | 1:150            | BD Transduction Labs (Palo Alto, CA, USA)  |
| E-cadherin       | Mouse (monoclonal)  | 610182 (Clone 36) | 1:200            | BD Transduction Labs (Palo Alto, CA, USA)  |
| APC              | Rabbit (monoclonal) | ab40778           | 1:100            | Abcam (Cambridge, MA, USA )                |
| c-Myc            | Mouse (monoclonal)  | sc-40             | 1:50             | Santa Cruz Biotechnology (Dallas, TX, USA) |
| Cyclin-D1        | Mouse (monoclonal)  | sc-8396           | 1:50             | Santa Cruz Biotechnology (Dallas, TX, USA) |

**Supplementary Table S2. Mean score values and significance (Student's *t* Test) of the quantitative analysis reported in Supplementary Figure S1. *P* value threshold: *P* < 0.05. Significant values are highlighted in red**

| <b>HUMAN</b>                 | Mean score | ±S.D. | <i>P</i> vs NM                  | <i>P</i> vs previous Stage | <b>RAT</b> | Mean score | ±S.D. | <i>P</i> vs NM                  | <i>P</i> vs previous Stage           |
|------------------------------|------------|-------|---------------------------------|----------------------------|------------|------------|-------|---------------------------------|--------------------------------------|
| <b>Nuclear β-catenin</b>     |            |       |                                 |                            |            |            |       |                                 |                                      |
| NM                           | 5          | 0.00  |                                 |                            | NM         | 5          | 0.00  |                                 |                                      |
| IBD                          | 7          | 2.74  | 0.177807808                     |                            | IBD        | 8          | 2.74  | 0.070483997                     |                                      |
| LD                           | 10         | 6.12  | 0.141927448                     | 0.20800000 vs IBD          | LD         | 16         | 5.48  | <b>0.010899699</b>              | <b>0.002837846</b> vs IBD            |
| HD                           | 20         | 0.00  | <b>1.18835x10<sup>-12</sup></b> | <b>0.022048174</b> vs LD   | HD         | 20         | 0.00  | <b>1.18835x10<sup>-12</sup></b> | 0.179236763 vs LD                    |
| IS                           | 15         | 5.48  | <b>0.010899699</b>              | 0.179236763 vs HD          | IS         | 16         | 5.48  | <b>0.010899699</b>              | 0.179236763 vs HD                    |
| K                            | 6          | 2.24  | 0.373900966                     | <b>0.011056493</b> vs IS   | K          | 14         | 5.48  | <b>0.021311641</b>              | 0.373900966 vs IS                    |
| <b>Membranous β-catenin</b>  |            |       |                                 |                            |            |            |       |                                 |                                      |
| NM                           | 20         | 0.00  |                                 |                            | NM         | 14         | 5.48  |                                 |                                      |
| IBD                          | 20         | 0.00  | 0.373900966                     |                            | IBD        | 18         | 4.47  | 0.177807808                     |                                      |
| LD                           | 16         | 5.48  | 0.177807808                     | 0.179236763 vs IBD         | LD         | 11         | 5.48  | 0.208000000                     | <b>0.024896163</b> vs IBD            |
| HD                           | 5          | 0.02  | <b>1.18203x10<sup>-12</sup></b> | <b>0.010928395</b> vs LD   | HD         | 5          | 0.00  | <b>0.021311641</b>              | 0.070483997 vs LD                    |
| IS                           | 6          | 2.24  | <b>0.000151011</b>              | 0.373900966 vs HD          | IS         | 6          | 2.24  | <b>0.01613009</b>               | 0.373900966 vs HD                    |
| K                            | 17         | 6.71  | 0.373900966                     | <b>0.051374431</b> vs IS   | K          | 14         | 5.34  | 0.373900966                     | <b>0.01619462</b> vs IS              |
| <b>Total E-cadherin</b>      |            |       |                                 |                            |            |            |       |                                 |                                      |
| NM                           | 16         | 5.48  |                                 |                            | NM         | 16         | 5.48  |                                 |                                      |
| IBD                          | 18         | 4.47  | 0.373900966                     |                            | IBD        | 18         | 4.47  | 0.373900966                     |                                      |
| LD                           | 14         | 5.48  | 0.373900966                     | 0.177807808 vs IBD         | LD         | 12         | 4.47  | 0.177807808                     | 0.070483997 vs IBD                   |
| HD                           | 18         | 4.47  | 0.373900966                     | 0.177807808 vs LD          | HD         | 6,4        | 4.93  | <b>2.53213x10<sup>-6</sup></b>  | 0.071076798 vs LD                    |
| IS                           | 4,6        | 4.93  | <b>0.003981595</b>              | <b>0.004278734</b> vs HD   | IS         | 1          | 0.00  | <b>0.003602233</b>              | 0.070483997 vs HD                    |
| K                            | 10         | 0.00  | 0.070483997                     | 0.070483997 vs IS          | K          | 10         | 0.00  | 0.070489127                     | <b>1.4762x10<sup>-10</sup></b> vs IS |
| <b>Membranous E-cadherin</b> |            |       |                                 |                            |            |            |       |                                 |                                      |
| NM                           | 20         | 0.00  |                                 |                            | NM         | 20         | 0.00  |                                 |                                      |
| IBD                          | 20         | 0.00  | 0.373900966                     |                            | IBD        | 10         | 0.00  | <b>9.5233x10<sup>-11</sup></b>  |                                      |
| LD                           | 14         | 5.48  | 0.070483997                     | 0.071262472 vs IBD         | LD         | 8          | 2.74  | <b>0.000608185</b>              | 0.183594823 vs IBD                   |
| HD                           | 7          | 2.74  | <b>0.000445954</b>              | <b>0.004635839</b> vs LD   | HD         | 6          | 2.24  | <b>0.000151011</b>              | 0.177807808 vs LD                    |
| IS                           | 5          | 0.00  | <b>1.88619x10<sup>-11</sup></b> | 0.177835707 vs HD          | IS         | 5          | 0.00  | <b>1.8862x10<sup>-11</sup></b>  | 0.373900966 vs HD                    |
| K                            | 14         | 5.48  | 0.070483997                     | <b>0.021504336</b> vs IS   | K          | 20         | 0.00  | 0.373900966                     | <b>1.2382x10<sup>-11</sup></b> vs IS |

| <b>HUMAN</b>           | <b>Mean score</b> | <b>±S.D.</b> | <b>P vs NM</b>                  | <b>P vs previous Stage</b>           | <b>RAT</b> | <b>Mean score</b> | <b>±S.D.</b> | <b>P vs NM</b>                 | <b>P vs previous Stage</b>            |
|------------------------|-------------------|--------------|---------------------------------|--------------------------------------|------------|-------------------|--------------|--------------------------------|---------------------------------------|
| <b>Total APC</b>       |                   |              |                                 |                                      |            |                   |              |                                |                                       |
| <b>NM</b>              | 10                | 0.00         |                                 |                                      | <b>NM</b>  | 10                | 0.00         |                                |                                       |
| <b>IBD</b>             | 20                | 0.00         | <b>4.32343x10<sup>-9</sup></b>  |                                      | <b>IBD</b> | 18                | 4.47         | <b>0.01613009</b>              |                                       |
| <b>LD</b>              | 20                | 0.00         | <b>2.76078x10<sup>-10</sup></b> | 0.649988954 vs IBD                   | <b>LD</b>  | 18                | 4.47         | <b>0.01613009</b>              | <b>0.01613009</b> vs IBD              |
| <b>HD</b>              | 16                | 5.48         | 0.057668886                     | 0.178381187 vs LD                    | <b>HD</b>  | 16                | 4.47         | 0.373900966                    | 0.070483997 vs LD                     |
| <b>IS</b>              | 12,5              | 5.00         | 0.391002219                     | 0.181690114 vs HD                    | <b>IS</b>  | 1                 | 0.00         | <b>1.4645x10<sup>-14</sup></b> | <b>0.005336446</b> vs HD              |
| <b>K</b>               | 4                 | 4.93         | 0.057668886                     | <b>4.34235x10<sup>-5</sup></b> vs IS | <b>K</b>   | 4,6               | 4.93         | 0.070483997                    | 0.178124329 vs IS                     |
| <b>Nuclear APC</b>     |                   |              |                                 |                                      |            |                   |              |                                |                                       |
| <b>NM</b>              | 10                | 0.00         |                                 |                                      | <b>NM</b>  | 10                | 0.00         |                                |                                       |
| <b>IBD</b>             | 10                | 0.00         | 0.422649731                     |                                      | <b>IBD</b> | 10                | 0.00         | 0.422649731                    |                                       |
| <b>LD</b>              | 10                | 0.00         | 0.422649731                     | 0.547089186 vs IBD                   | <b>LD</b>  | 10                | 0.00         | 0.422649731                    | 1 vs IBD                              |
| <b>HD</b>              | 4,6               | 2.74         | 0.422649731                     | 0.072048725 vs LD                    | <b>HD</b>  | 7                 | 2.74         | 0.422649731                    | 0.070484204 vs LD                     |
| <b>IS</b>              | 1                 | 0.00         | <b>4.38548x10<sup>-5</sup></b>  | 0.177835707 vs HD                    | <b>IS</b>  | 5                 | 0.00         | <b>4.43852x10<sup>-7</sup></b> | 0.177808092 vs HD                     |
| <b>K</b>               | 1                 | 0.00         | <b>4.43852x10<sup>-7</sup></b>  | 0.43137677 vs IS                     | <b>K</b>   | 5                 | 0.00         | <b>4.43852x10<sup>-7</sup></b> | 1 vs IS                               |
| <b>Total c-Myc</b>     |                   |              |                                 |                                      |            |                   |              |                                |                                       |
| <b>NM</b>              | 1                 | 0.00         |                                 |                                      | <b>NM</b>  | 2,8               | 4.02         |                                |                                       |
| <b>IBD</b>             | 14                | 5.48         | <b>0.006057526</b>              |                                      | <b>IBD</b> | 10                | 0.00         | <b>0.01613009</b>              |                                       |
| <b>LD</b>              | 20                | 0.00         | <b>4.61371x10<sup>-13</sup></b> | 0.071262472 vs IBD                   | <b>LD</b>  | 16                | 5.48         | <b>0.005129326</b>             | 0.070483997 vs IBD                    |
| <b>HD</b>              | 12,5              | 5.00         | 0.019312445                     | <b>0.057668886</b> vs LD             | <b>HD</b>  | 12                | 4.47         | <b>1.33584x10<sup>-6</sup></b> | 0.177807808 vs LD                     |
| <b>IS</b>              | 10                | 0.00         | <b>1.37276x10<sup>-7</sup></b>  | 0.422649731 vs HD                    | <b>IS</b>  | 10                | 0.00         | <b>0.01613009</b>              | 0.373900966 vs HD                     |
| <b>K</b>               | 3,25              | 4.50         | 0.391002219                     | <b>1.37276E-07</b> vs IS             | <b>K</b>   | 6,4               | 4.93         | 0.177807808                    | 0.177807808 vs IS                     |
| <b>Nuclear c-Myc</b>   |                   |              |                                 |                                      |            |                   |              |                                |                                       |
| <b>NM</b>              | 5                 | 0.00         |                                 |                                      | <b>NM</b>  | 6                 | 2.24         |                                |                                       |
| <b>IBD</b>             | 13                | 6.71         | <b>0.056</b>                    |                                      | <b>IBD</b> | 14                | 5.48         | <b>0.01613009</b>              |                                       |
| <b>LD</b>              | 18                | 4.47         | <b>0.002888981</b>              | 0.088987311 vs IBD                   | <b>LD</b>  | 20                | 0.00         | <b>0.000151011</b>             | 0.070483997 vs IBD                    |
| <b>HD</b>              | 16,67             | 5.77         | 0.07282735                      | 0.422649731 vs LD                    | <b>HD</b>  | 17,5              | 5.00         | <b>0.015392438</b>             | 0.391002219 vs LD                     |
| <b>IS</b>              | 20                | 0.00         | <b>4.94047x10<sup>-8</sup></b>  | 0.423227369 vs HD                    | <b>IS</b>  | 18                | 4.47         | <b>0.01613009</b>              | 0.391002219 vs HD                     |
| <b>K</b>               | 5                 | 0.00         | 0.373900966                     | <b>4.94047E-08</b> vs IS             | <b>K</b>   | 8                 | 2.74         | 0.177807808                    | <b>0.021742978</b> vs IS              |
| <b>Total Cyclin-D1</b> |                   |              |                                 |                                      |            |                   |              |                                |                                       |
| <b>NM</b>              | 1                 | 0.00         |                                 |                                      | <b>NM</b>  | 1                 | 0.00         |                                |                                       |
| <b>IBD</b>             | 6,4               | 4.93         | 0.070483997                     |                                      | <b>IBD</b> | 10                | 0.00         | <b>1.37276x10<sup>-7</sup></b> |                                       |
| <b>LD</b>              | 1                 | 0.00         | 0.373900966                     | 0.070484061 vs IBD                   | <b>LD</b>  | 2                 | 4.02         | 0.373900966                    | <b>1.37276x10<sup>-7</sup></b> vs IBD |

|                          |     |      |                    |                                |        |            |     |      |                                 |                  |        |
|--------------------------|-----|------|--------------------|--------------------------------|--------|------------|-----|------|---------------------------------|------------------|--------|
| <b>HD</b>                | 1   | 0.00 | 0.373900966        | 0.43137677                     | vs LD  | <b>HD</b>  | 2   | 4.02 | 0.373900966                     | 0.373900966      | vs LD  |
| <b>IS</b>                | 8,2 | 4.02 | <b>0.01613009</b>  | <b>0.01613009</b>              | vs HD  | <b>IS</b>  | 8,4 | 7.89 | 0.104076293                     | 0.071088282      | vs HD  |
| <b>K</b>                 | 18  | 4.47 | <b>0.001050578</b> | <b>1.03792x10<sup>-6</sup></b> | vs IS  | <b>K</b>   | 16  | 5.48 | <b>0.003602233</b>              | 0.248146391      | vs IS  |
| <b>Nuclear Cyclin-D1</b> |     |      |                    |                                |        |            |     |      |                                 |                  |        |
| <b>NM</b>                | 5   | 0.00 |                    |                                |        | <b>NM</b>  | 5   | 0.00 |                                 |                  |        |
| <b>IBD</b>               | 5   | 0.00 | 0.373900966        |                                |        | <b>IBD</b> | 12  | 4.47 | <b>0.024896163</b>              |                  |        |
| <b>LD</b>                | 5   | 0.00 | 0.373900966        | 0.814902011                    | vs IBD | <b>LD</b>  | 5   | 0.00 | 0.373900966                     | <b>0.0249018</b> | vs IBD |
| <b>HD</b>                | 5   | 0.00 | 0.373900966        | 0.411406737                    | vs LD  | <b>HD</b>  | 8   | 2.74 | 0.070483997                     | 0.070483999      | vs LD  |
| <b>IS</b>                | 7   | 2.74 | 0.177807808        | 0.177750897                    | vs HD  | <b>IS</b>  | 13  | 6.71 | <b>0.056000000</b>              | 0.089009343      | vs HD  |
| <b>K</b>                 | 17  | 6.71 | <b>0.01613009</b>  | <b>0.021742978</b>             | vs IS  | <b>K</b>   | 20  | 0.00 | <b>1.89731x10<sup>-15</sup></b> | 0.080097572      | vs IS  |

Supplementary Table S3. Wnt pathway targeting compounds in clinical trials

| Compound         | Target                                                          | Modality       | Tumor Type                                                                                              | Clinical Trials Identifier                | Phase                            | Sponsor                                                         |
|------------------|-----------------------------------------------------------------|----------------|---------------------------------------------------------------------------------------------------------|-------------------------------------------|----------------------------------|-----------------------------------------------------------------|
| <b>LGK974</b>    | Porcupine<br>(essential for Wnt protein secretion and function) | Small molecule | Melanoma; Breast Neoplasms; Lobular Carcinoma; Triple-negative Breast Cancer; Pancreatic Adenocarcinoma | NCT01351103                               | Phase 1                          | Novartis Pharmaceuticals                                        |
| <b>BHQ880</b>    | DKK-1                                                           | Antibody       | Multiple Myeloma                                                                                        | NCT00741377<br>NCT01337752<br>NCT01302886 | Phase 1<br>Phase 2<br>Phase 2    | Novartis Pharmaceuticals                                        |
| <b>DKN-01</b>    | DKK-1                                                           | Antibody       | Multiple Myeloma; Solid Tumors; Non-Small Cell Lung Cancer                                              | NCT01457417<br>NCT01711671                | Phase 1<br>Phases 1/2            | Dekkun Corporation                                              |
| <b>OMP-18R5</b>  | Fzd receptors                                                   | Antibody       | Solid Tumors                                                                                            | NCT01345201<br>NCT01957007                | Phase 1<br>Phase 1               | OncoMed Pharmaceuticals, Inc                                    |
| <b>OMP-54F28</b> | Wnt ligands                                                     | Antibody       | Solid Tumors                                                                                            | NCT01608867                               | Phase 1                          | OncoMed Pharmaceuticals, Inc<br>Collaborator: Bayer             |
| <b>PRI-724</b>   | $\beta$ -catenin/CBP antagonist                                 | Small molecule | Myeloid Leukemia; Pancreatic Adenocarcinoma; Solid tumor                                                | NCT01606579<br>NCT01764477<br>NCT01302405 | Phases 1/2<br>Phase 1<br>Phase 1 | Prism Pharma Co., Ltd<br>Collaborator: inVentiv Health Clinical |

Detailed information available on <http://clinicaltrials.gov>
